# Supplementary material for: Phosphorus cycling in the North and South Atlantic Ocean subtropical gyres
Source: Springer Nature journal article supplement (doi:10.1038/ngeo232), 2008-06-22
Supplement: ngeo232-s1.pdf [file ngeo232-s1.pdf]

## Supplementary Information

| <i>Cruise</i> | <i>Cruise Number</i> | <i>Date</i>                                       | <i>Transect</i> |
|---------------|----------------------|---------------------------------------------------|-----------------|
| AMT10         | JR049                | 12 <sup>th</sup> April-8 <sup>th</sup> May, 2000  | 40 °N – 40 °S   |
| D279          | D279                 | 4 <sup>th</sup> April-10 <sup>th</sup> May, 2004  | 24 °N           |
| AMT14         | JR101                | 28 <sup>th</sup> April-1 <sup>st</sup> June, 2004 | 40 °N – 40 °S   |
| AMT15         | D284                 | 17 <sup>th</sup> Sep-29 <sup>th</sup> Oct, 2004   | 40 °N – 40 °S   |
| CD171         | CD171                | 1 <sup>st</sup> May-15 <sup>th</sup> June, 2005   | 36 °N           |
| AMT16         | D294                 | 20 <sup>th</sup> May-29 <sup>th</sup> June, 2005  | 40 °N – 40 °S   |
| AMT17         | D299                 | 15 <sup>th</sup> Oct-28 <sup>th</sup> Nov, 2005   | 40 °N – 40 °S   |

**Supplemental Table 1.** Cruise dates and transects.

| <i>Cruise</i> | <i>Station</i> | <i>Lat (N)</i> | <i>Long (E)</i> | <i>Date</i> | <i>Experiments Conducted</i> |
|---------------|----------------|----------------|-----------------|-------------|------------------------------|
| AMT16         | 1              | -31.5823       | 16.5842         | 21/05/2005  | APA activities               |
| AMT16         | 6              | -29.5797       | 0.42            | 26/05/2005  | APA activities               |
| AMT16         | 13             | -26.31595      | -17.1359        | 30/05/2005  | APA activities               |
| AMT16         | 15             | -25.3626       | -21.5597        | 31/05/2005  | APA activities               |
| AMT16         | 21             | -16.16745      | -24.5996        | 03/06/2005  | APA activities, MM kinetics  |
| AMT16         | 25             | -9.04825       | -24.5981        | 05/06/2005  | APA activities               |
| AMT16         | 28             | -1.3762        | -24.5966        | 07/06/2005  | APA activities               |
| AMT16         | 31             | 4.1618         | -27.0168        | 09/06/2005  | APA activities, MM kinetics  |
| AMT16         | 35             | 10.0004        | -29.476         | 11/06/2005  | APA activities               |
| AMT16         | 38             | 15.4575        | -32.361         | 13/06/2005  | APA activities, MM kinetics  |
| AMT16         | 40             | 18.5789        | -34.124         | 14/06/2005  | APA activities               |
| AMT16         | 48             | 31.2299        | -42.0865        | 18/06/2005  | APA activities               |
| AMT16         | 50             | 33.3468        | -45.324         | 19/06/2005  | APA activities, MM kinetics  |
| AMT16         | 52             | 34.5417        | -42.3357        | 20/06/2005  | APA activities               |

|       |    |           |           |            |                             |
|-------|----|-----------|-----------|------------|-----------------------------|
| AMT16 | 54 | 36.0413   | -38.2054  | 21/06/2005 | APA activities, MM kinetics |
| AMT16 | 56 | 37.2093   | -33.3963  | 22/06/2005 | APA activities              |
| AMT16 | 58 | 38.1832   | -30.0383  | 23/06/2005 | APA activities              |
| AMT16 | 60 | 41.0832   | -26.2261  | 24/06/2005 | APA activities, MM kinetics |
| AMT16 | 62 | 43.4411   | -22.524   | 25/06/2005 | APA activities              |
| AMT17 | 4  | 44.21107  | -19.19465 | 20/10/2005 | APA activities, MM kinetics |
| AMT17 | 9  | 31.18044  | -32.02516 | 30/10/2005 | APA activities              |
| AMT17 | 11 | 29.31558  | -36.16381 | 31/10/2005 | APA activities              |
| AMT17 | 13 | 27.46839  | -38.48518 | 01/11/2005 | APA activities              |
| AMT17 | 15 | 28.57702  | -36.46745 | 02/11/2005 | APA activities, MM kinetics |
| AMT17 | 20 | 18.22954  | -33.54865 | 04/11/2005 | APA activities              |
| AMT17 | 26 | 9.26356   | -29.30828 | 07/11/2005 | APA activities              |
| AMT17 | 32 | 3.28751   | -26.39559 | 09/11/2005 | APA activities              |
| AMT17 | 38 | -10.59805 | -24.59777 | 13/11/2005 | APA activities, MM kinetics |
| AMT17 | 40 | -14.22814 | -24.59814 | 14/11/2005 | APA activities              |
| AMT17 | 42 | -18.33323 | -24.59571 | 15/11/2005 | APA activities, MM kinetics |
| AMT17 | 47 | -22.09298 | -20.09298 | 17/11/2005 | APA activities, MM kinetics |
| AMT17 | 49 | -23.45372 | -16.31447 | 18/11/2005 | APA activities, MM kinetics |
| AMT17 | 51 | -27.23481 | -8.06555  | 20/11/2005 | APA activities, MM kinetics |
| AMT17 | 53 | -28.51141 | -4.40583  | 21/11/2005 | APA activities, MM kinetics |
| AMT17 | 55 | -30.40154 | -0.18044  | 22/11/2005 | APA activities, MM kinetics |
| AMT17 | 57 | -32.31529 | 4.14304   | 23/11/2005 | APA activities              |
| AMT17 | 59 | -33.38738 | 8.55072   | 24/11/2005 | APA activities, MM kinetics |

**Supplemental Table 2.** Station locations and experiments conducted.

|                              | <i>NASG June APA</i> | <i>NASG November APA</i> |
|------------------------------|----------------------|--------------------------|
| Mean                         | 2.435956003          | 0.835433553              |
| Variance                     | 2.61546819           | 0.070897095              |
| Observations                 | 7                    | 5                        |
| Hypothesized Mean Difference | 0                    |                          |
| df                           | 6                    |                          |
| t Stat                       | 2.570087676          |                          |
| P(T<=t) one-tail             | 0.021165006          |                          |

t Critical one-tail

1.943180274

**Supplemental Table 3.** One-tailed T-test for NASG June (Spring) and NASG November (Autumn) APA activities ( $\text{nM P h}^{-1} \mu\text{g C}^{-1}$ ).  $P < 0.05$ .

|                              | <i>NASG June APA</i> | <i>SASG November APA</i> |
|------------------------------|----------------------|--------------------------|
| Mean                         | 2.435956003          | 0.837833319              |
| Variance                     | 2.61546819           | 0.077716777              |
| Observations                 | 7                    | 4                        |
| Hypothesized Mean Difference | 0                    |                          |
| df                           | 7                    |                          |
| t Stat                       | 2.549039374          |                          |
| P(T<=t) one-tail             | 0.019078538          |                          |
| t Critical one-tail          | 1.894578604          |                          |

**Supplemental Table 4.** One-tailed T-test for NASG June (Spring) and SASG November (Spring) APA activities ( $\text{nM P h}^{-1} \mu\text{g C}^{-1}$ ).  $P < 0.05$ .

|                              | <i>NASG November APA</i> | <i>SASG November APA</i> |
|------------------------------|--------------------------|--------------------------|
| Mean                         | 0.911853222              | 0.203772919              |
| Variance                     | 0.055596354              | 0.01303397               |
| Observations                 | 4                        | 10                       |
| Hypothesized Mean Difference | 0                        |                          |
| df                           | 4                        |                          |
| t Stat                       | 5.742820116              |                          |
| P(T<=t) one-tail             | 0.00227804               |                          |
| t Critical one-tail          | 2.131846782              |                          |

**Supplemental Table 5.** One-tailed T-test for NASG June (Autumn) and SASG November (Spring) APA activities ( $\text{nM P h}^{-1} \mu\text{g C}^{-1}$ ).  $P < 0.05$ .

|                              | <i>SASG DOP</i> | <i>NASG DOP</i> |
|------------------------------|-----------------|-----------------|
| Mean                         | 148.5283        | 77.50564        |
| Variance                     | 5344.552        | 18555.78        |
| Observations                 | 40              | 98              |
| Hypothesized Mean Difference | 0               |                 |
| df                           | 126             |                 |
| t Stat                       | 3.95206         |                 |
| P(T<=t) one-tail             | 6.42E-05        |                 |
| t Critical one-tail          | 2.356307        |                 |

**Supplemental Table 6.** One-tailed T-test for NASG DOP concentrations and SASG DOP concentrations (nM) from cruises AMT10, D279, AMT14, AMT15, CD171, AMT16 and AMT17.  $P < 0.01$ .

|  | <i>NASG June DOP</i> | <i>NASG November DOP</i> |
|--|----------------------|--------------------------|
|--|----------------------|--------------------------|

|                              |            |            |
|------------------------------|------------|------------|
| Mean                         | 0.080023   | 0.21424428 |
| Variance                     | 0.001516   | 0.00117931 |
| Observations                 | 8          | 8          |
| Hypothesized Mean Difference | 0          |            |
| df                           | 14         |            |
| t Stat                       | 7.31255909 |            |
| P(T<=t) one-tail             | 1.9173E-06 |            |
| t Critical one-tail          | 1.76131012 |            |

**Supplemental Table 7.** One-tailed T-test for NASG June (Spring) and NASG November (Autumn) DOP concentrations (nM) from cruises AMT16 and AMT17.  $P < 0.05$ .
